# Supplementary material for: Novel Pyrrolidinium-Functionalized Styrene-b-ethylene-b-butylene-b-styrene Copolymer Based Anion Exchange Membrane with Flexible Spacers for Water Electrolysis
Source: MDPI journal article supplement (doi:10.3390/membranes13030328), 2023-03-13
Supplement: s1 [file s1]

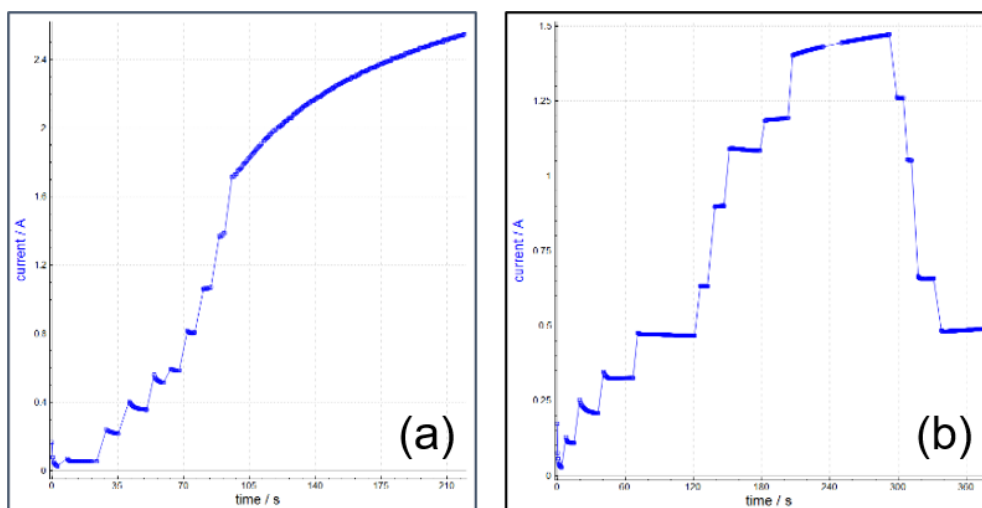

Figure S1. (a) potentiostatic conditioning in 0.1 M KOH electrolyte; (b) potentiostatic conditioning in UPW.
